# Supplementary material for: Biological Efficacy of Compounds from Stingless Honey and Sting Honey against Two Pathogenic Bacteria: An In Vitro and In Silico Study
Source: MDPI journal article supplement (doi:10.3390/molecules27196536), 2022-10-03
Supplement: s1 [file s1]

# Biological efficacy of compounds from stingless honey and sting honey against two pathogenic bacteria: an in vitro and in silico study

Shirmin Islam<sup>†1</sup>, Joy Pramanik<sup>†1</sup>, Suvro Biswas<sup>1</sup>, Moniruzzaman<sup>1</sup>, Jui Biswas<sup>1</sup>, Akhtar-E-Ekram<sup>1</sup>, Shahriar Zaman<sup>1</sup>, Salah Uddin<sup>1</sup> and Abu Saleh<sup>\*1</sup>, Sabry Hassan<sup>2</sup>

<sup>1</sup>Microbiology Laboratory, Department of Genetic Engineering and Biotechnology, University of Rajshahi, Rajshahi-6205, Bangladesh

<sup>2</sup>Biology Department, College of Science, Taif University, P.O. Box 11099, Taif 21944, Saudi Arabia

<sup>†</sup>Equal contribution.

\* Correspondence: authors' Email: saleh@ru.ac.bd

**Table S1:** Molecular docking of Stingless honey compounds and the bacterial targeted protein (6d5z).

| SL No | Compound Name                                              | CID      | MW     | Docking Score |
|-------|------------------------------------------------------------|----------|--------|---------------|
| 1.    | Furfural                                                   | 7362     | 96.08  | -4.0          |
| 2.    | Furfuryl Alcohol                                           | 7361     | 98.10  | -3.9          |
| 3.    | 2-Hydroxy-2-cyclopenten1-one                               | 82674    | 98.10  | -4.2          |
| 4.    | Methyl succinic anhydride                                  | 20051    | 114.10 | -4.5          |
| 5.    | 2-Furancarboxaldehyde, 5-methyl                            | 12097    | 110.11 | -4.1          |
| 6.    | 2,4-Dihydroxy-2,5-dimethyl-3(2H)-furan 3-one               | 538757   | 144.12 | -5.4          |
| 7.    | furan-2,5-dicarboxaldehyde                                 | 69980    | 124.09 | -4.1          |
| 8.    | 4H-Pyran-4-one,2,3-dihydro-3,5-dihydroxy-6-methy           | 119838   | 144.12 | -4.8          |
| 9.    | 4H-Pyran-4-one,3,5-dihydroxy-2-methyl                      | 70627    | 142.11 | -4.8          |
| 10.   | 5-Formyl-2-furfurylmethanoate                              | 58489131 | 140.14 | -4.6          |
| 11.   | 2-Furancarboxaldehyde,5-(hydroxymethyl) (furan derivative) | 237332   | 126.11 | -4.3          |
| 12.   | beta.-D-Glucopyranose,1,6-anhydro                          | 13037722 | 162.14 | -5.2          |

**Table S2:** Molecular docking of sting honey compounds and the bacterial targeted protein (6d5z).

| SL. No | Compound Name                                        | CID    | MW           | Docking Score |
|--------|------------------------------------------------------|--------|--------------|---------------|
| 1.     | Furfuryl Alcohol                                     | 7361   | 98.1g/mol    | -3.9          |
| 2.     | 2-Hydroxy-2-cyclopenten 1-one                        | 62752  | 126.15g/mol  | -4.8          |
| 3.     | 2,4-Dihydroxy-2,5-dimethyl 3(2H)-furan-3-one (furan) | 538757 | 144.12 g/mol | -5.4          |
| 4.     | 4H-Pyran-4-one,2,3-dihydro 3,5-dihydroxy-6-methyl    | 119838 | 144.12 g/mol | -4.8          |
| 5.     | 2-Furancarboxaldehyde, 5                             | 24354  | 100.12 g/mol | -3.7          |
| 6.     | Decycltetraglycol                                    | 526715 | 334.5g/mol   | -4.4          |
| 7.     | Tetra ethylene glycol monododecyl ether              | 78933  | 362.5 g/mol  | -4.1          |

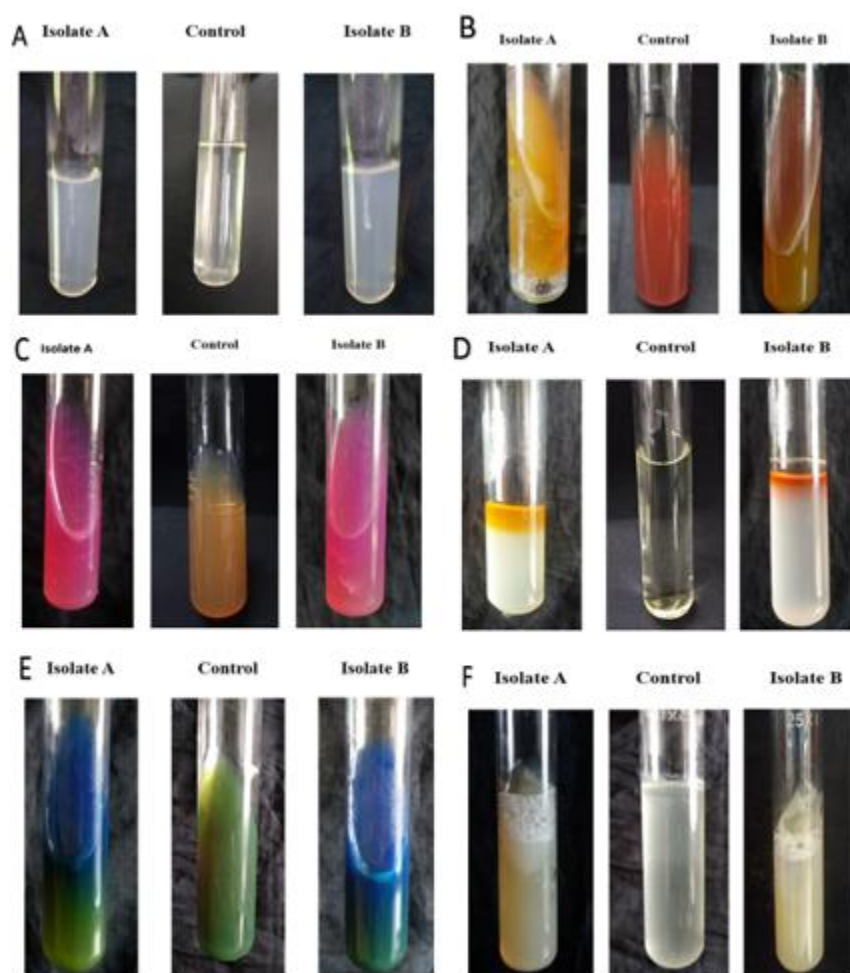

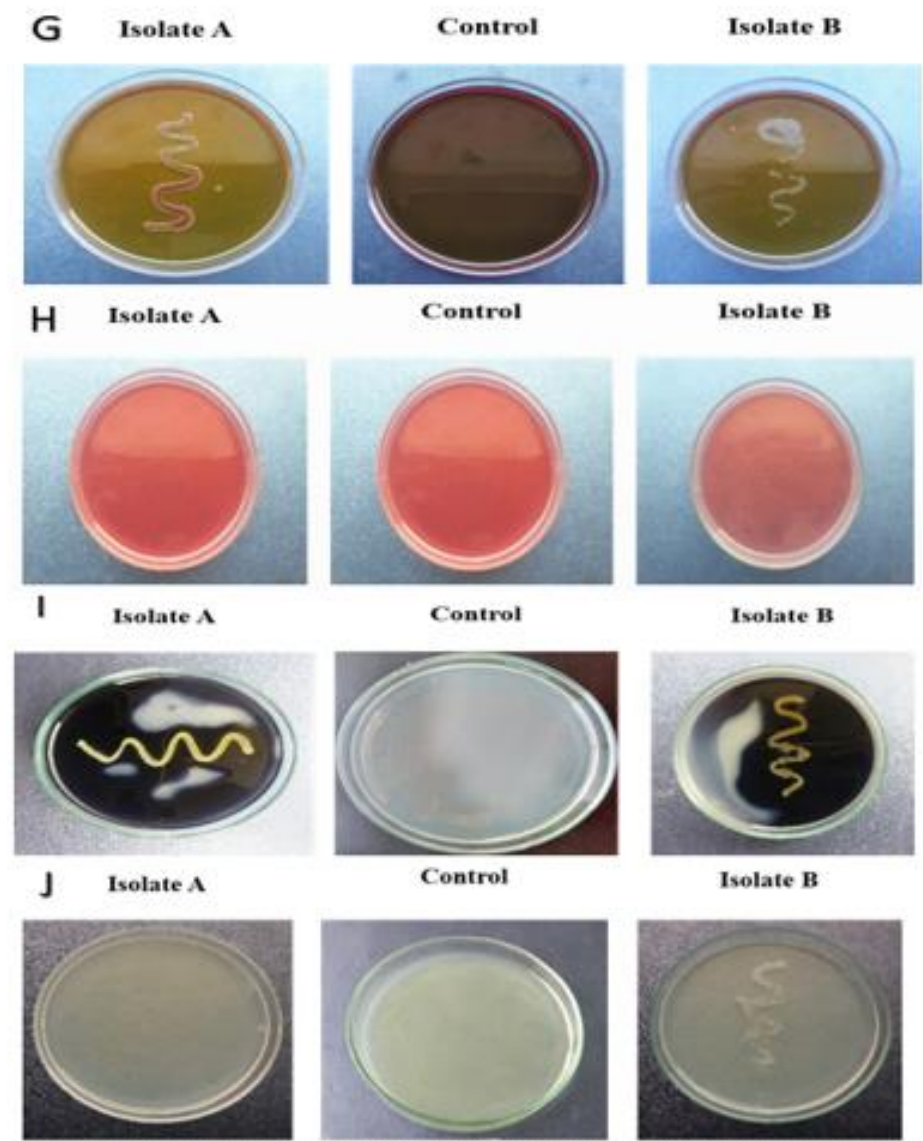

**Fig S1.** Morphological test; Mortality test (A). Biochemical test of isolate A and isolate B. Urease hydrolysis test (B), Methyl red test (C), TSI test (D), Simmons citrate test (E), Catalase test (F), EMB agar (G), Mannitol salt agar (H), Bismuth sulfide agar test (I) and Starch agar test (J).
